# Supplementary material for: Fabrication of zwitterionic and pH-responsive polyacetal dendrimers for anticancer drug delivery
Source: Royal Society of Chemistry journal article supplement (doi:10.1039/c9bm00606k), 2019-01-01
Supplement: c9bm00606k1.pdf [file c9bm00606k1.pdf]

## **Fabrication of zwitterionic and pH-responsive polyacetal dendrimers for anticancer drug delivery**

Yaqiang Wang,<sup>‡a,b</sup> Da Huang,<sup>‡c</sup> Xing Wang,<sup>\*a,b,d</sup> Hong Shen,<sup>a</sup> Fei Yang<sup>a,b</sup> and Decheng Wu<sup>\*a,b</sup>

<sup>a</sup> Beijing National Laboratory for Molecular Sciences, Institute of Chemistry, Chinese Academy of Sciences, Beijing 100190, China. E-mail: wangxing@iccas.ac.cn; dcwu@iccas.ac.cn; Tel: +86 10 82611492

<sup>b</sup> University of Chinese Academy of Sciences, Beijing 100049, China

<sup>c</sup> College of Biological Science and Engineering, Fuzhou University, Fuzhou 350116, China.

<sup>d</sup> State Key Laboratory of Molecular Engineering of Polymers, Fudan University, Shanghai 200433, China.

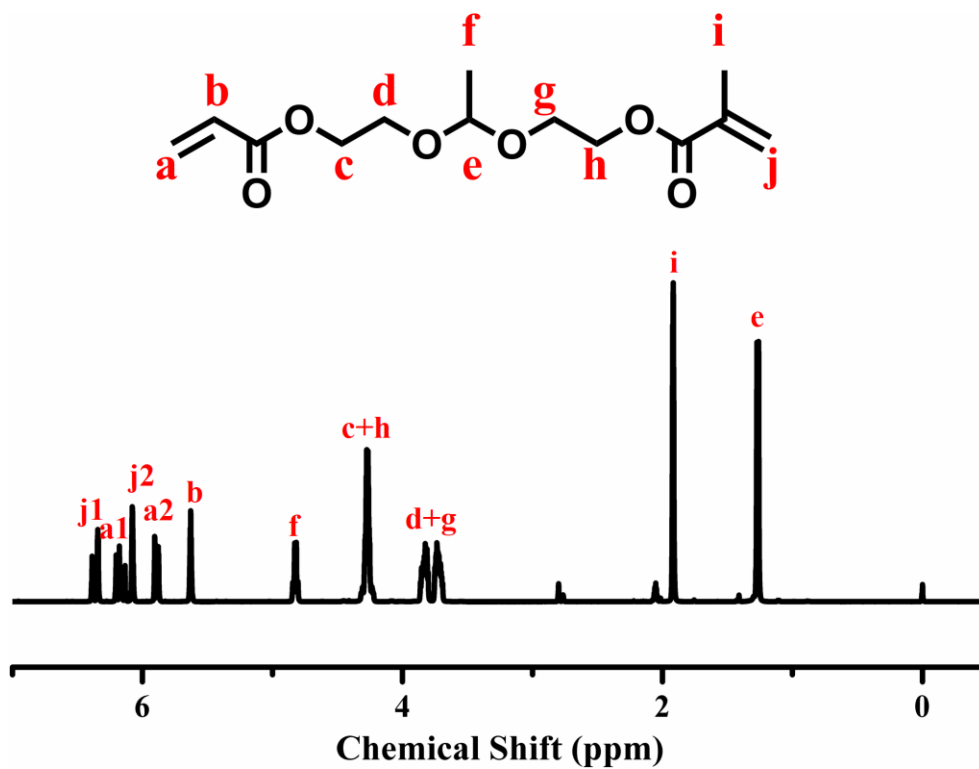

Fig. S1  $^1\text{H}$  NMR spectrum of acetal monomer (AEEEM).

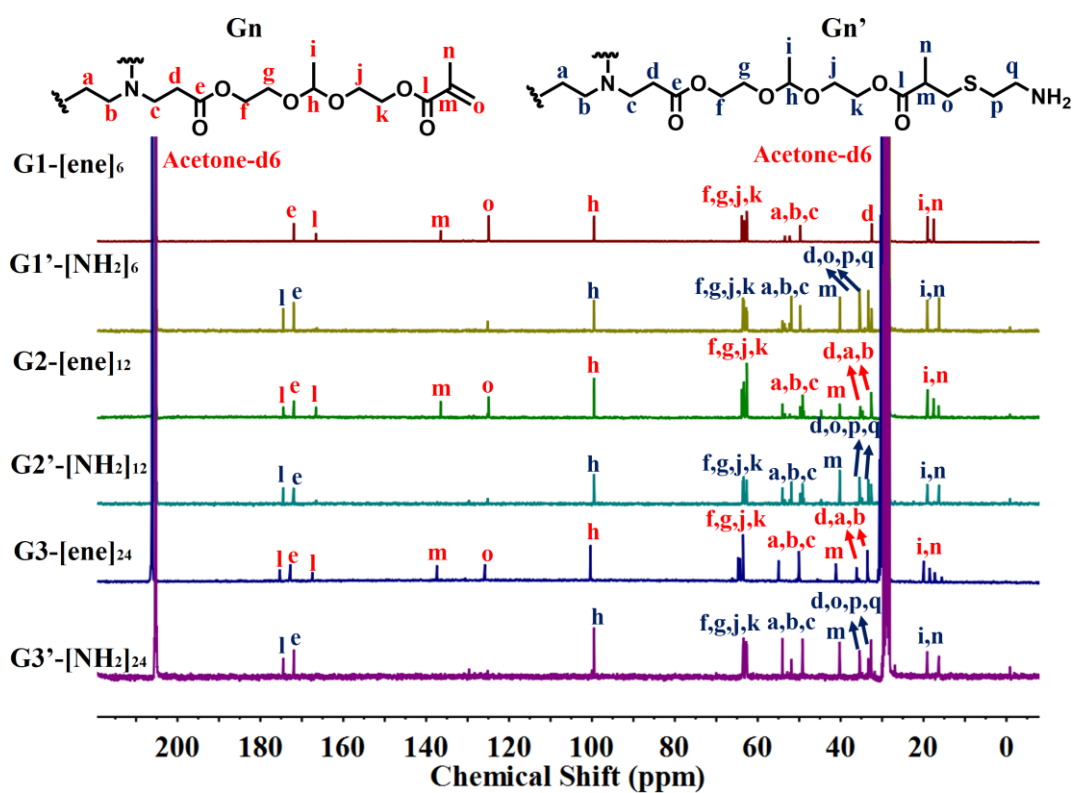

Fig. S2  $^{13}\text{C}$  NMR spectra of G1-G3 polyacetal dendrimers.

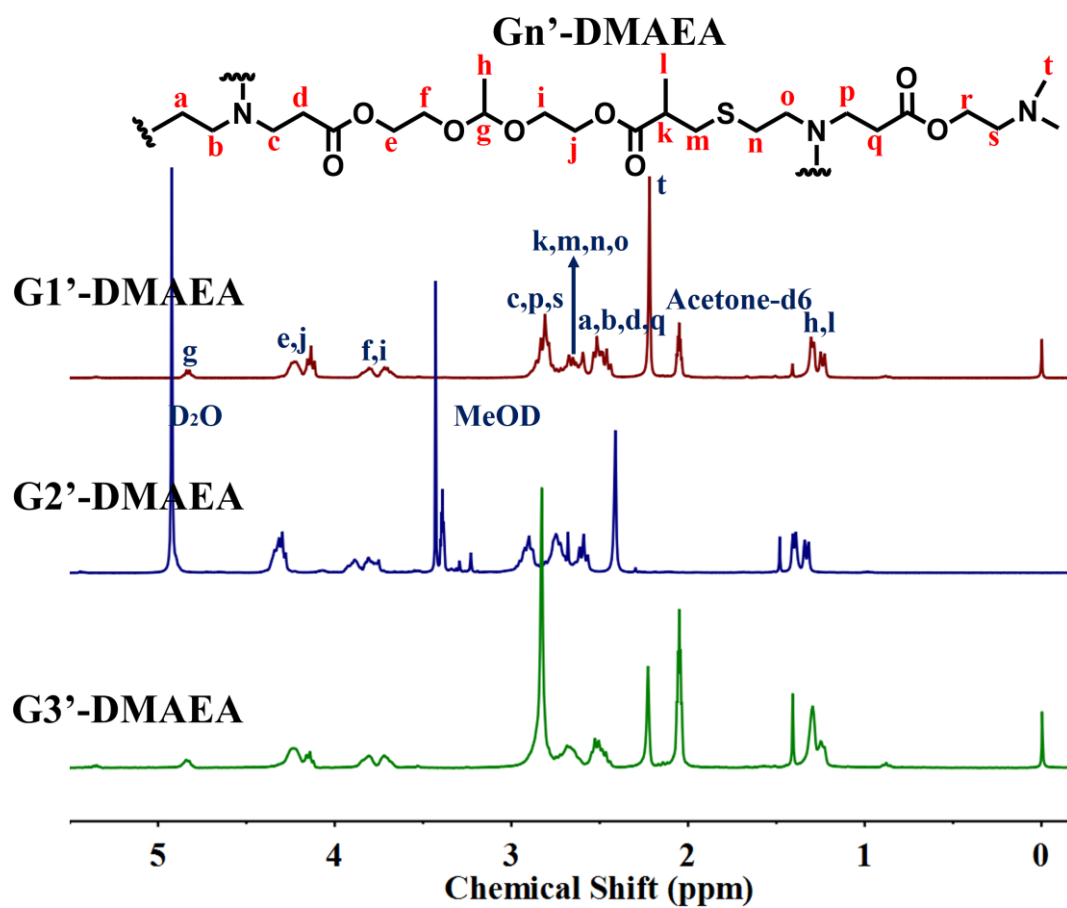

Fig. S3 <sup>1</sup>H NMR spectra of Gn'-DMAEA.

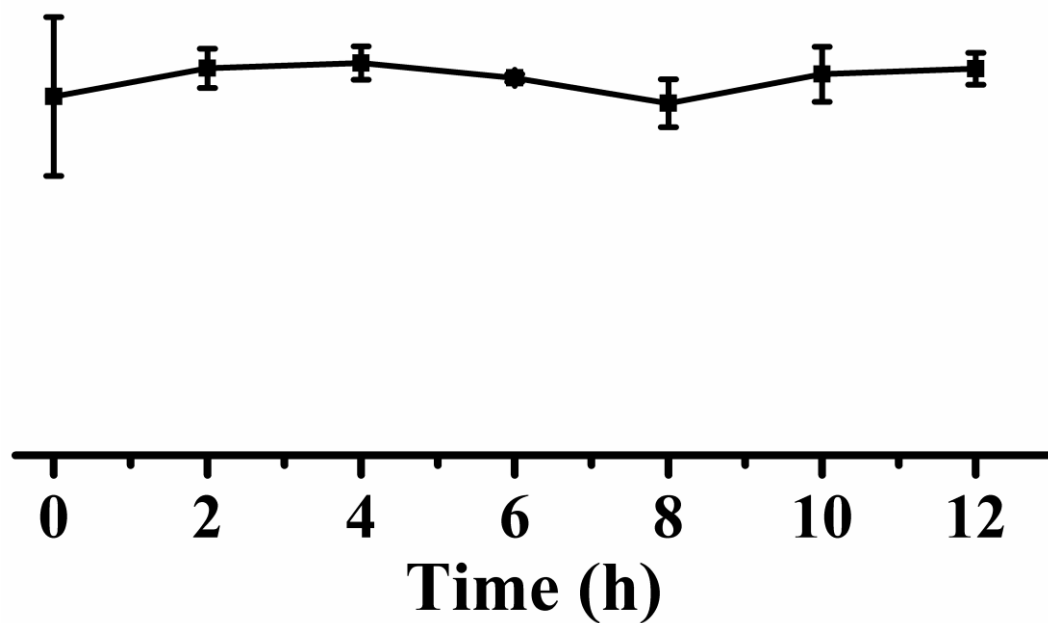

Fig. S4 Resistance protein absorption behavior of G3'-SB.

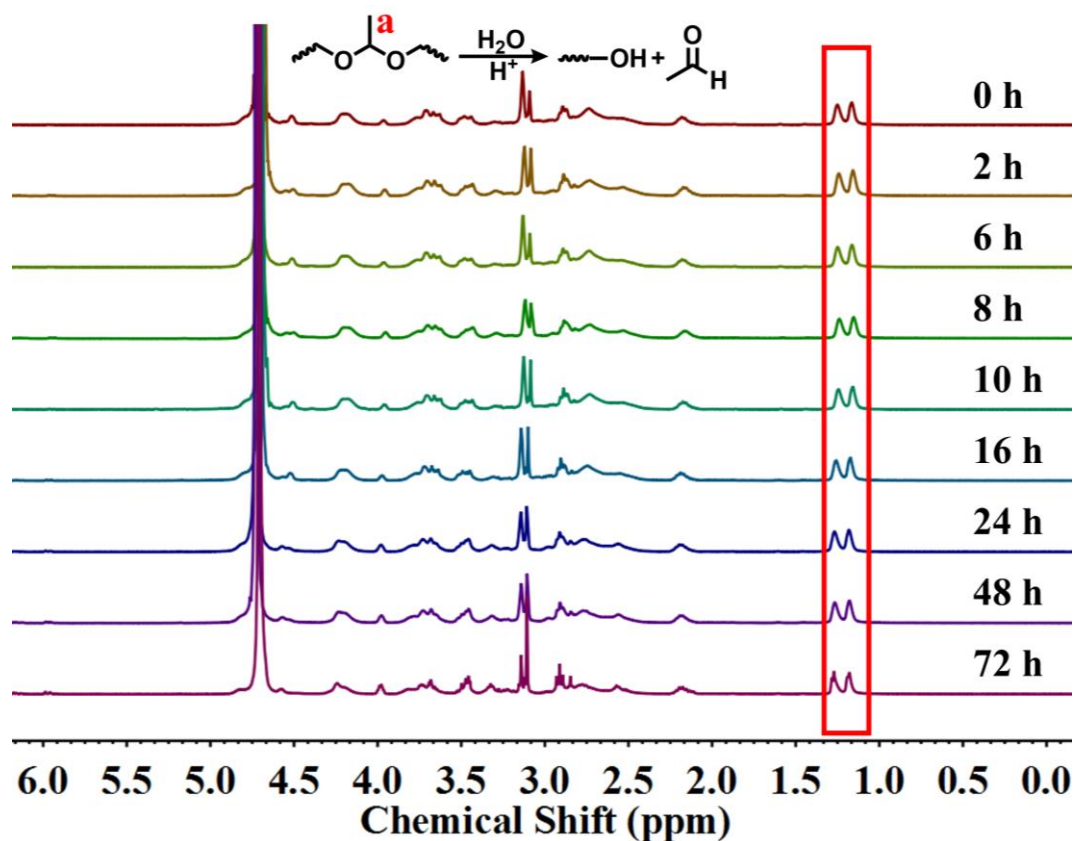

Fig. S5 Comparison of the  $^1\text{H}$  NMR spectra recorded in situ for degradation of G3'-SB at pH=5.0.

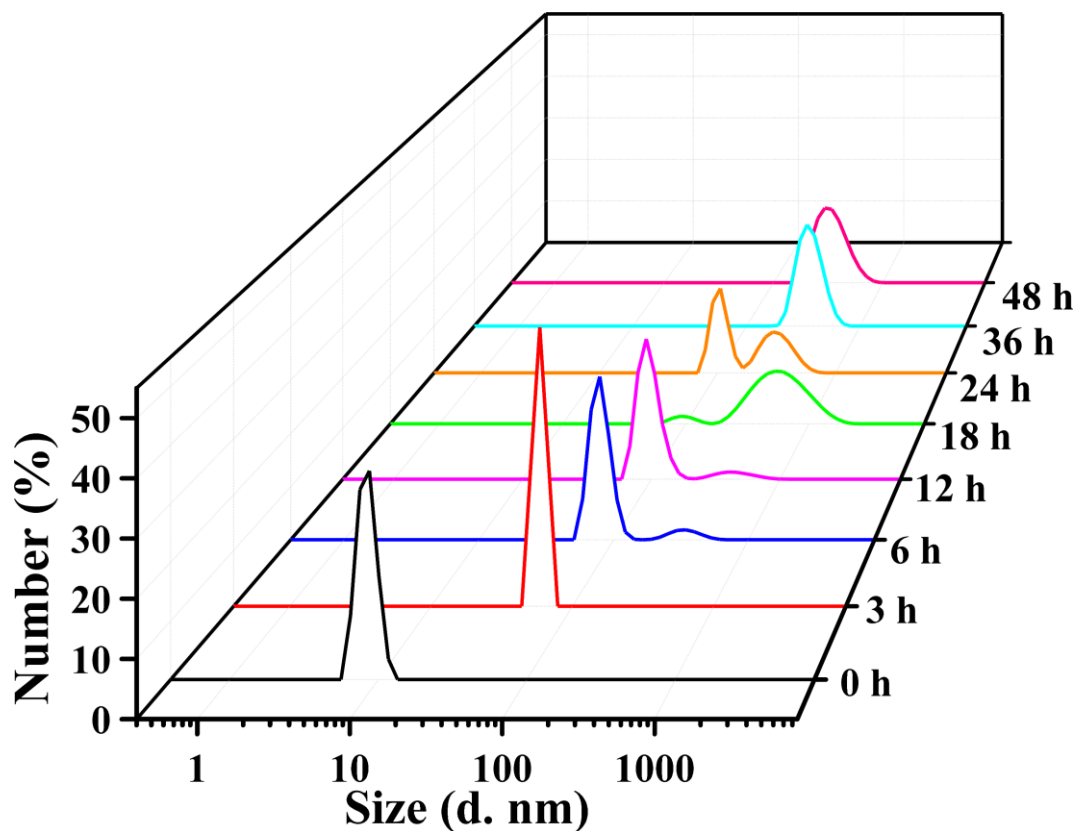

Fig. S6 Comparison of the DLS profiles recorded in situ for degradation of G3'-SB at pH=5.0.

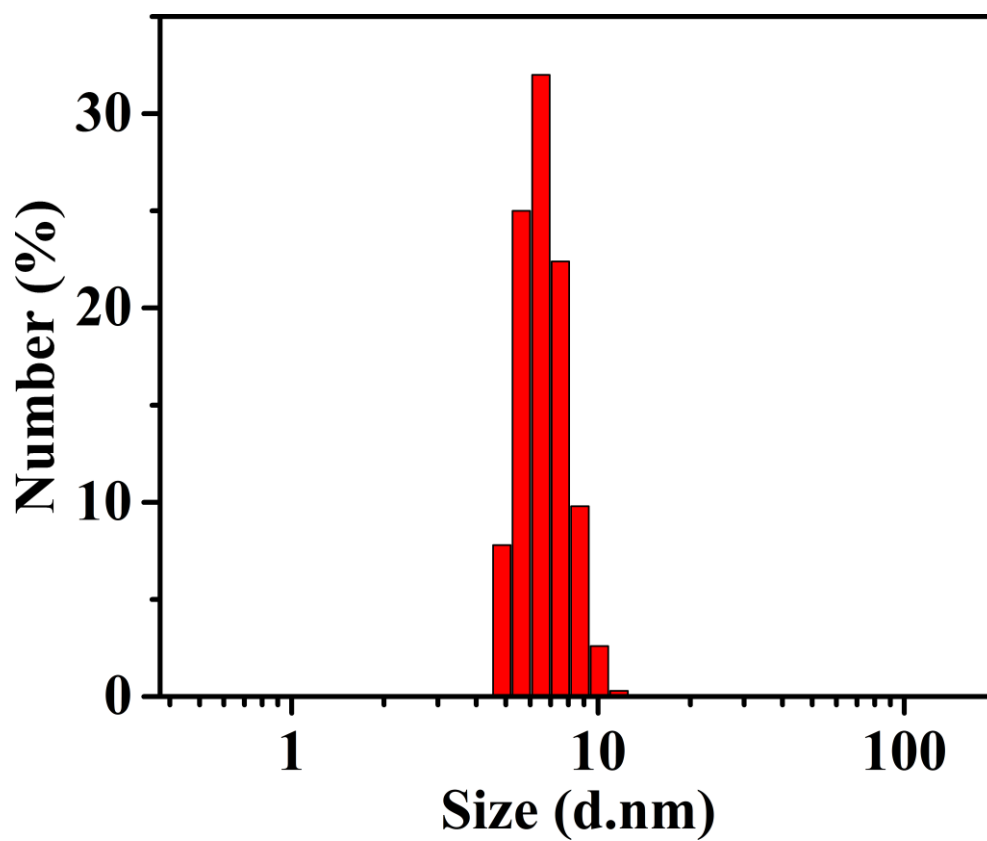

**Fig. S7** Size of G3'-SB@DOX measured by DLS.

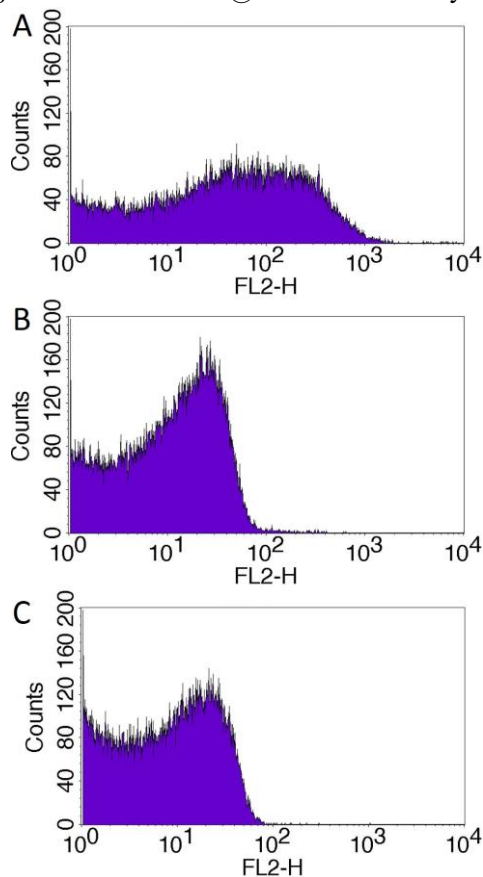

**Fig. S8** Flow cytometer analysis of G3'-SB@DOX nanoparticles incubated with HeLa cells under (A) pH=4.0, (B) pH=6.0 and (C) pH=8.0 buffer solutions.

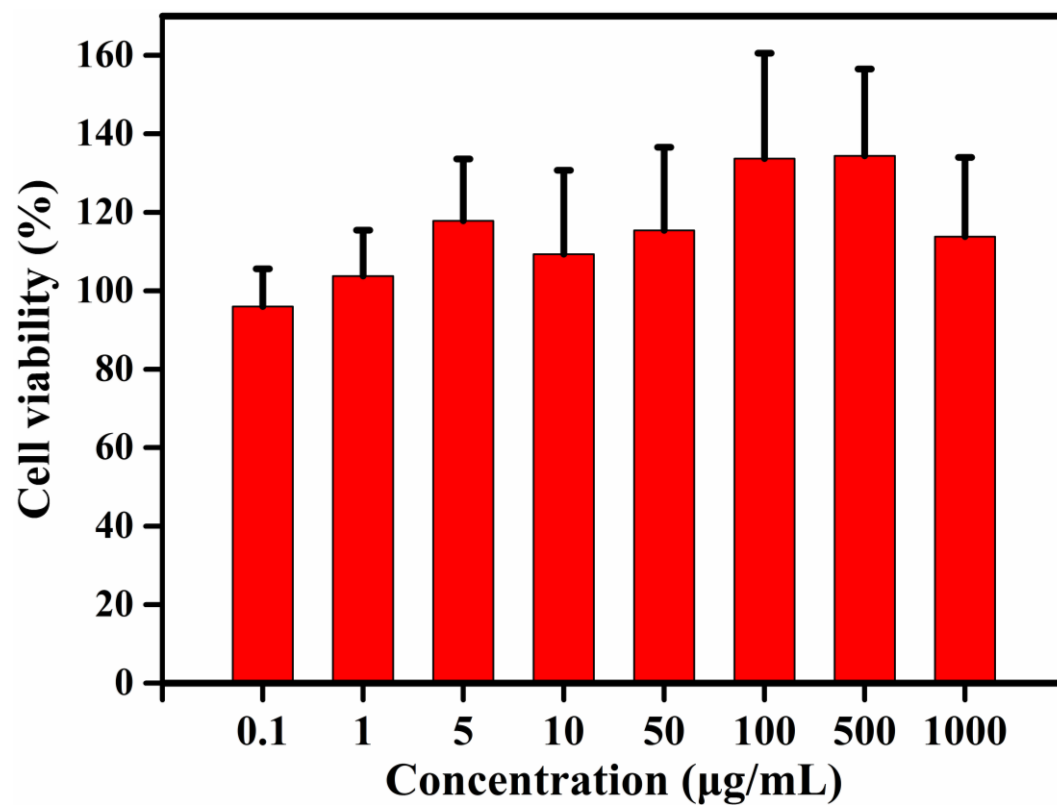

**Fig. S9** *In vitro* cytotoxicity of G3'-SB against MC3T3-E1 cells.
